# Supplementary material for: Dysfunction of Foxp3+ Regulatory T Cells Induces Dysbiosis of Gut Microbiota via Aberrant Binding of Immunoglobulins to Microbes in the Intestinal Lumen
Source: MDPI journal article supplement (doi:10.3390/ijms24108549), 2023-05-10

**Supplementary Figure S1. Ig-coated bacteria and fecal Igs did not increase until day 14 in *Foxp3* cKO mice.**

(A, B) Flow cytometric analyses of IgA- and IgG-coated fecal bacteria on days 0 (A) and 14 (B). Numbers in the plots indicate the percentages of IgA-coated (left) and IgG-coated (right) bacteria. (C, D) Amounts of fecal IgA (left) and IgG (right) on days 0 (C) and 14 (D) measured using ELISA. Each dot in the graphs indicates an individual mouse, and horizontal lines represent the means. The data represent two independent experiments. n.s.: not significant [Welch's t-test (A, B) or Mann-Whitney test (C, D)].

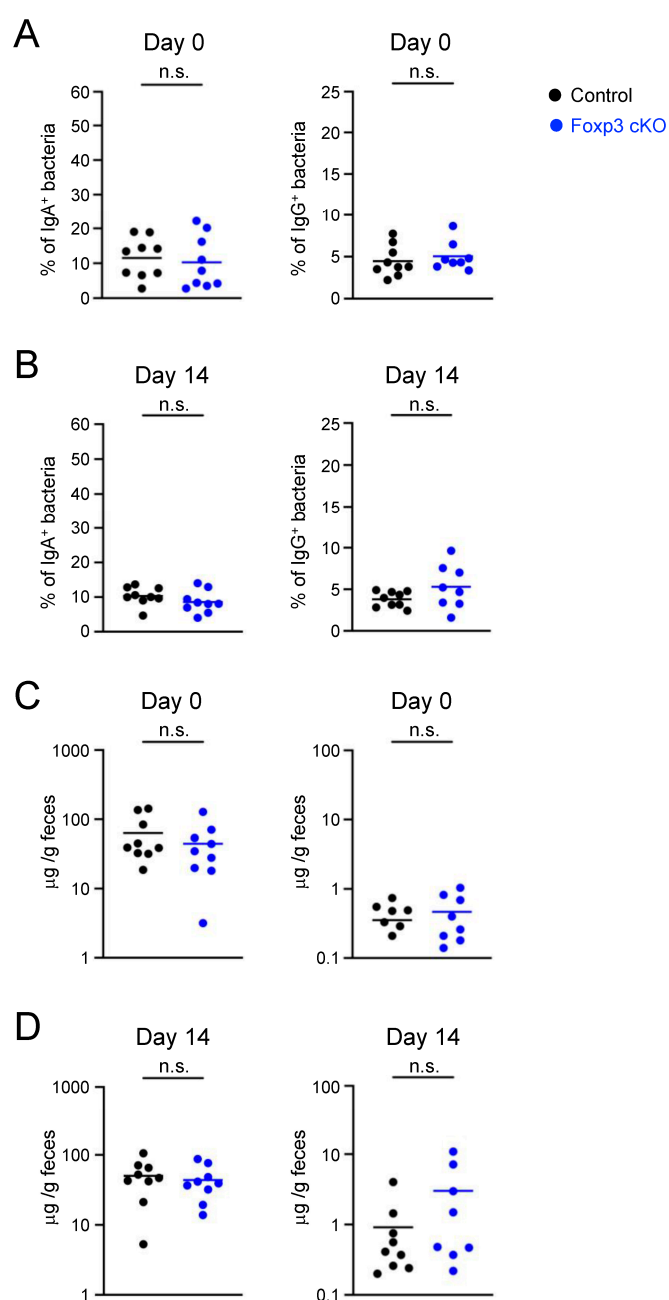

### Supplementary Figure S2. Inflammatory status of intestines of Foxp3 cKO mice.

(A) Histological sections of hematoxylin and eosin (H&E)-stained colons. The scale bar indicates 100  $\mu$ m. (B) Colon length and (C) weight. (D) Proportion of CD45<sup>+</sup> cells among live cells. The data represent two (A–C) or three (D) independent experiments. \*\* $p < 0.01$ , \*\*\* $p < 0.001$ , n.s.: not significant [Student's  $t$ -test (B, C) or Welch's  $t$ -test (D)].

A

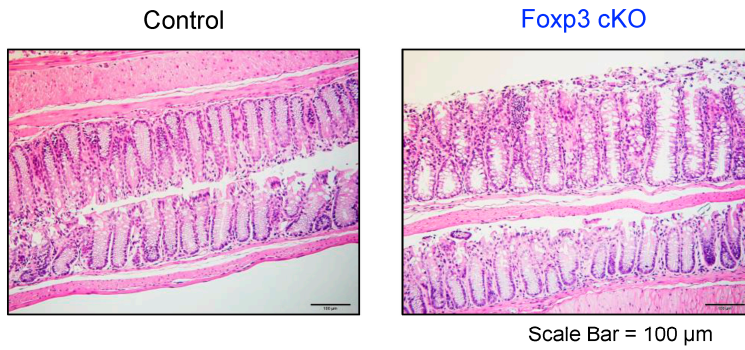

B

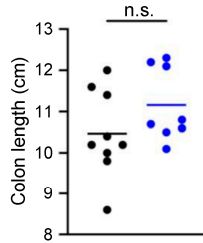

C

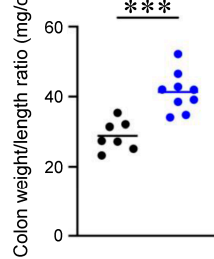

D

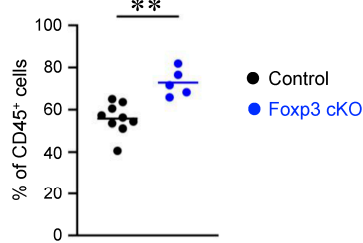

### Supplementary Figure S3. Cytokine production of CD4<sup>+</sup> T cells in lamina propria.

Lamina propria cells isolated from the colon were stimulated with PMA and ionomycin in the presence of monensin for 4 h at 37 °C. Frequencies of IFN $\gamma$ <sup>+</sup>, IL-4<sup>+</sup>, and IL-17<sup>+</sup> cells among CD4<sup>+</sup> cells were analyzed using flow cytometry. Representative flow cytometry plots (left) and quantification (right) are presented. The data represent two independent experiments. \* $p < 0.05$ , \*\*\* $p < 0.001$ , n.s.: not significant (Welch's  $t$ -test).

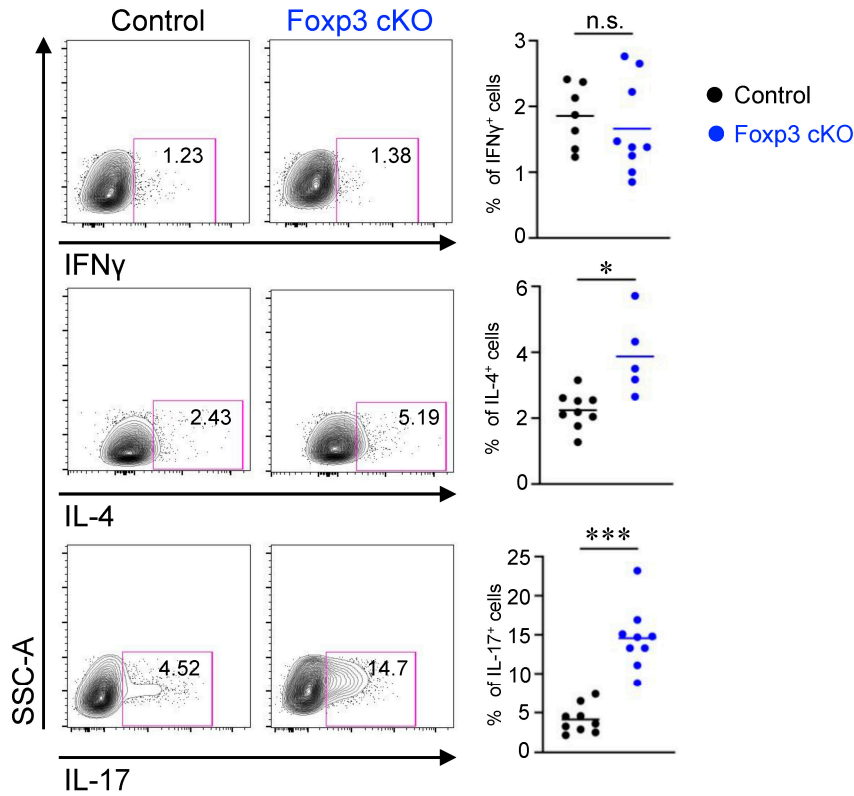

**Supplementary Figure S4. Antibiotic treatment did not affect serum immunoglobulin concentrations.**

Serum IgA and IgG concentrations measured using ELISA. Each dot in the graphs represents an individual mouse, and horizontal lines represent the means. The data represent three independent experiments. n.s.: not significant (Mann-Whitney test).

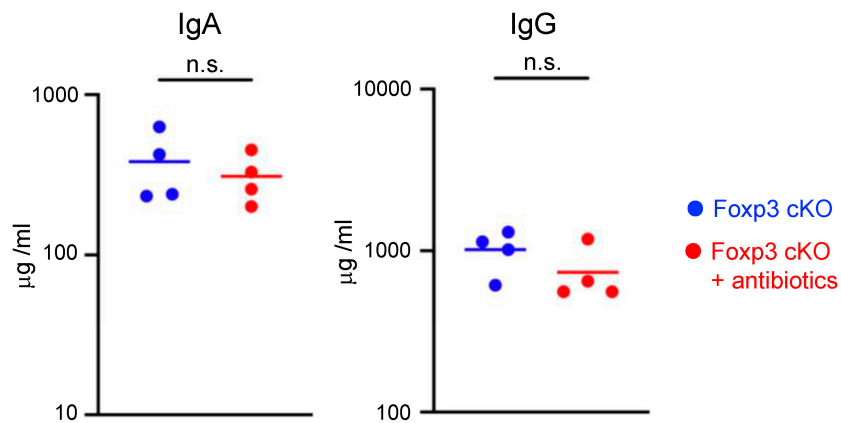

Supplement: s1 [file s1]
